17 **Abstract**

18 Phages infecting *S. aureus* have the potential to be used as therapeutics against antibiotic-  
19 resistant bacterial infections. However, there is limited information about the mechanism of  
20 genome delivery of phages that infect Gram-positive bacteria. Here we present the structures of  
21 *S. aureus* phage P68 in its native form, genome ejection intermediate, and empty particle. The  
22 P68 head contains seventy-two subunits of inner core protein, fifteen of which bind to and alter  
23 the structure of adjacent major capsid proteins and thus specify attachment sites for head  
24 fibers. Unlike in the previously studied phages, the head fibers of P68 enable its virion to  
25 position itself at the cell surface for genome delivery. P68 genome ejection is triggered by  
26 disruption of the interaction of one of the portal protein subunits with phage DNA. The inner  
27 core proteins are released together with the DNA and enable the translocation of phage  
28 genome across the bacterial membrane into the cytoplasm.

29

30 **Key Words:** structure, *Staphylococcus aureus*, bacteriophage, cryo-electron microscopy

31

32 **Introduction**

33 Phages from the family *Podoviridae* have complex virions composed of genome-containing  
34 heads and short non-contractile tails. The tail is attached to a special fivefold vertex of the head  
35 in which a pentamer of capsid proteins is replaced by a portal complex. The tails of podoviruses  
36 are formed of lower collar proteins, knobs, spikes, and fibers<sup>1</sup>. Podoviruses that infect *S. aureus*  
37 often use cell wall teichoic acid as a receptor<sup>2,3</sup>. After binding to a cell, podoviruses disrupt the  
38 bacterial cell wall and eject their genomes into the cell cytoplasm<sup>1</sup>.

39 Phages infecting *S. aureus* are of interest because of their potential use in phage therapy  
40 against antibiotic-resistant infections<sup>4</sup>. *S. aureus* causes a range of illnesses from minor skin  
41 infections to life-threatening diseases such as pneumonia, meningitis, and sepsis<sup>5-7</sup>. Many  
42 *S. aureus* strains, particularly those found in hospitals, carry antibiotic resistance genes<sup>8,9</sup>.  
43 Annual medical expenses caused by *S. aureus* in the United States and European Union have  
44 been estimated to exceed \$2.5 billion<sup>10-12</sup>.

45 Bacteriophage P68 belongs to the subfamily *Picovirinae*, and the genus *P68virus* of  
46 phages infecting *S. aureus*<sup>13</sup>. P68 has a 18,227-bp-long double-stranded DNA genome that  
47 encodes 22 open reading frames<sup>13</sup>. Here we used a combination of cryo-electron microscopy  
48 (cryo-EM) and X-ray crystallography to structurally characterize the virion of phage P68 and the  
49 mechanism of its genome ejection.

50

## 51 **Results and Discussion**

### 52 **Virion structure of phage P68**

53 The virion of P68 has an icosahedral head with a diameter of 480 Å and 395 Å-long tail,  
54 which is decorated with tail fibers (Fig. 1ab, Table S1, S2). Electron micrographs of a purified P68  
55 sample contained not only native virions but also particles that were in the process of genome  
56 release and empty particles (SFig. 1). The complete structure of the native virion of P68 was  
57 determined to a resolution of 4.7 Å (SFig. 2, 3, Table S1). The structures of the capsid and tail  
58 with imposed icosahedral and twelfold symmetries, respectively, were determined to  
59 resolutions of 3.3 and 3.9 Å (SFig. 2, 3, 4, Table S1).

### 60 **P68 capsid structure**

61 The capsid proteins in the P68 head are organized in a T = 4 icosahedral lattice (Fig. 2ab)  
62 <sup>14</sup>. The major capsid protein gp20 has the canonical HK97 fold common to numerous tailed  
63 phages and herpesviruses <sup>15-17</sup>. According to the HK97 convention, the protein can be divided  
64 into four domains: the N-terminal arm (residues 1-84), extended loop (85-124), peripheral  
65 domain (125-182 and 346-388), and axial domain (183-277, 341-345, and 389-408) (Fig. 2c).  
66 Unlike in HK97, the P68 major capsid protein also contains an insertion domain (residues 278-  
67 340). The insertion and peripheral domains form a cleft that binds the extended loop of an  
68 adjacent major capsid protein and thus contribute to the capsid's stability (SFig. 5).

69 The quasi-equivalent structure of the T = 4 icosahedral capsid includes conformational  
70 differences in the major capsid proteins from the icosahedral asymmetric unit (Fig. 2bc). The N-  
71 terminal arms and extended loops are in one plane in the major capsid proteins that connect  
72 two hexagons (Fig. 2c). In contrast, the same domains are bent 16° in the major capsid proteins  
73 that form pentagons, and 8° in subunits that connect hexagons to pentagons (Fig. 2c). Additional  
74 differences among the capsid proteins are in the structures of residues 253-263 from the axial  
75 domain, which fold into  $\alpha$ -helices in subunits that form pentamers and loops in subunits that  
76 belong to hexamers (Fig. 2d).

### 77 **Inner capsid proteins mediate contacts of capsid with genome**

78 The inner face of the P68 capsid is lined by inner capsid proteins gp21, organized with  
79 icosahedral T = 4 symmetry (Fig. 2e). Except for an  $\alpha$ -helix formed by residues 14-21, the 55-  
80 residue-long inner capsid protein "Arstotzka" lacks secondary structure elements. The inner  
81 capsid proteins related by icosahedral threefold axes and quasi-threefold axes form three-  
82 pointed stars (Fig. 2e) and are arranged so that the N-terminus of one subunit is located close to  
83 the C-terminus of another one within the stars (Fig. 2e). In contrast to protein P30 of phage  
84 PRD1 <sup>18</sup>, the inner capsid proteins of P68 have limited contacts with each other.

85 The electron density of P68 double-stranded DNA is resolved inside the regions of the  
86 capsid lined by the inner capsid proteins, but it is missing in the proximity of fivefold vertices,  
87 where the inner capsid proteins are not structured (Fig. 2ef). The electron densities of two  
88 nucleotides of single-stranded DNA are stacked against the side chains of trp 74 of the major



89 capsid proteins that form pentamers (Fig. 2g). In contrast, the side chains of trp 74 of major  
90 capsid proteins that form hexamers interact with the side chains of his 51 of the inner capsid  
91 proteins (Fig. 2h), and thus cannot bind phage DNA. Therefore, the inner capsid proteins could  
92 enable the packaging of the P68 genome in its head. Furthermore, the inner capsid proteins  
93 could function in determining the triangulation number of the P68 capsid during assembly, as  
94 was shown for Sid proteins of the *Enterobacteria* phage P4 of the P2/P4 system<sup>19</sup>. The inner  
95 capsid proteins remain attached to the capsid after genome ejection, indicating that they do not  
96 participate in genome delivery (Fig. 1d).

### 97 **DNA is held inside the P68 head by interaction with one subunit of the portal complex**

98 The portal complex of P68 is formed of twelve gp19 subunits (Fig. 3ab). It is 80 Å long  
99 along its twelfold axis with the external diameters of the upper and lower parts of 140 and  
100 100 Å, respectively (Fig. 3a). The structure of the P68 portal protein could be built except for  
101 residues 1-6 and 83-104 out of 327. According to the convention<sup>15</sup>, it can be divided into three  
102 domains: the clip (residues 178-223), stem (6-41, 156-177, and 227-248), and wing (249-327)  
103 (Fig. 3a). Unlike the portal proteins of other phages, but similar to that of *Bacillus* phage phi29,  
104 the portal protein of P68 lacks a crown domain<sup>20-23</sup>. The clip domain is composed of helix  $\alpha$ 4  
105 and antiparallel strands  $\beta$ 4 and  $\beta$ 5. It forms part of the binding site for the lower collar complex  
106 and tail fibers. The stem domain of the portal protein is composed of a “tail fiber hook”  
107 (residues 6 – 11) and helices  $\alpha$ 1,  $\alpha$ 3, and  $\alpha$ 5 (Fig. 3a). The tail fiber hook enables the attachment  
108 of tail fibers to the portal complex, as discussed in detail below. Helices  $\alpha$ 1 and  $\alpha$ 3 of the stem  
109 domain form the outer surface of the portal complex that interacts with the capsid. The wing  
110 domain, which forms the part of the portal inside the phage head, consists of helices  $\alpha$ 2,  $\alpha$ 6-9  
111 and strands  $\beta$ 1-3. Helix  $\alpha$ 6 of the wing domain is inserted into the neighboring portal protein  
112 subunit and thus stabilizes the dodecamer structure of the portal complex (Fig. 3a).

113 Asymmetric reconstruction of the portal complex reveals a unique interaction of one of  
114 the portal proteins with the DNA positioned at the center of the portal channel (Fig. 3b-d). Helix  
115  $\alpha$ 9 from the wing domain of the unique DNA-binding subunit binds to a side of the DNA helix  
116 (Fig. 3bc). It is the only observed interaction that may hold P68 DNA inside its head.

### 117 **Interface between capsid and portal complex**

118 Asymmetric reconstruction of the entire P68 virion at a resolution of 4.7 Å enabled  
119 characterization of the interface between the capsid and portal complex (Fig. 3ef). Residues 1-  
120 42 from the N-terminal arm of the major capsid proteins adjacent to the portal are not  
121 structured. Residues 43-59 of the major capsid proteins wrap around the stem domains of  
122 portal proteins (Fig. 3f). If the major capsid proteins had the same structure as around the  
123 fivefold vertices occupied by capsid proteins, the N-terminal arms of the capsid proteins would  
124 clash with the portal and tail fibers (SFig. 6). It is likely that other tailed phages employ a similar  
125 mechanism for incorporating portal complexes into their capsids.

126

127 **Inner core proteins interact with the capsid and determine the attachment sites of head fibers**

128 The surface of the portal complex facing towards the center of the P68 head is covered  
129 by seventy-two subunits of the inner core protein gp22 (Fig. 3a). Only residues 91-114, which  
130 form an  $\alpha$ -helix, are resolved from each 147-residue long inner core protein. The six inner core  
131 proteins associated with each portal protein form two three-helix bundles related by a quasi-  
132 twofold rotational axis (Fig. 3a). Inner core proteins positioned closest to the capsid have  
133 additional structured residues that interact with axial domains of the adjacent major capsid  
134 proteins, and by modifying their conformations enable the attachment of head fibers to the  
135 capsid, as discussed below. Inner core proteins detach from the portal complex during the  
136 phage DNA release (Fig. 1c) and contain predicted pore-lining helices (SFig. 7)<sup>24</sup>, indicating that  
137 they may enable the transport of the phage DNA across the bacterial cytoplasmic membrane.

138 **Head fibers can position P68 particles for genome delivery at cell surface**

139 The P68 head is decorated with five trimers of head fibers gp14, which are attached to  
140 the hexamers of major capsid proteins adjacent to the tail vertex (Fig. 1a, 4ab). Low-resolution  
141 structures of head fibers are resolved in the asymmetric reconstruction of the P68 virion  
142 (Fig. 4a). Due to the mismatch of the fivefold symmetry of the head and twelvefold symmetry of  
143 the tail, only three head fibers are stabilized by interaction with the tail fibers (Fig. 4a). P68 head  
144 fibers can be divided into the N-terminal capsid-binding domain (residues 1-55),  $\alpha$ -helical stalk  
145 (56-339), and receptor-binding domain (340-481), which is positioned at the level of the  
146 receptor binding domains of tail-fibers (Fig. 4a). A cryo-EM map of the P68 head enabled the  
147 building of the poly-alanine structure of 55 residues of the capsid-binding domain, which is  
148 composed of three beta-sheets and an  $\alpha$ -helix (Fig. 4bc). Residues of the beta-sheets mediate  
149 the attachment of the head fiber to a hexamer of major capsid proteins (Fig. 4c). The alpha  
150 helices form a coiled coil that enables trimerization of the head fibers (Fig. 4bc). The selectivity  
151 of binding of the head fibers to the hexamers of major capsid proteins adjacent to the tail vertex  
152 is determined by interactions of the inner core proteins with the inner face of the capsid  
153 (Fig. 4de). Fifteen of the seventy-two inner core proteins present in the P68 head form  
154 structured “arms” that reach the axial domains of the closest hexamers of major capsid proteins  
155 (Fig. 4e). The interaction with the inner core proteins forces the side-chains of phe 259, from the  
156 axial domains of the major capsid proteins, to adopt a threefold symmetrical alternating “in and  
157 out” conformation (Fig. 4fg, SFig. 8a). In contrast, in hexamers of the major capsid proteins that  
158 do not interact with the inner core proteins, two phe 259 side chains point towards the center  
159 of the head and four side chains point away from the particle center (Fig. 4fh, SFig. 8b). In  
160 summary, the binding of the inner core proteins causes a change of symmetry of the six phe 259  
161 side chains from twofold to threefold, and thus defines the attachment sites for the head fiber  
162 trimers.

163 Residues 340-477 of the head fiber are homologous to the receptor binding proteins of  
164 lactococcal phages TP901-1, P2, and bIL170 (Table. S3)<sup>25-27</sup>. The putative receptor binding  
165 domains of P68 head fibers are positioned next to the receptor binding domains of tail fibers

166 (Fig. 4a). Therefore, the binding of head fibers to receptors can position P68 with its tail  
167 orthogonal to the cell surface for genome delivery. This is supported by the broader host range  
168 of phage P68 in comparison to the closely related phage 44AHJD, which lacks the gene for the  
169 head fiber<sup>13,28</sup>. In contrast, the head fibers of previously structurally characterized phages point  
170 in all directions and are thought to function in the reversible attachment of phages to cells in  
171 random orientations.

### 172 **Lower collar complex of P68 tail**

173 The lower collar complex is attached to the portal complex and forms the central part of  
174 the P68 tail (Fig. 1ab, 5a). The dodecamer of lower collar proteins (gp18) has the shape of a  
175 mushroom with a head diameter of 162 Å and total length of 146 Å (Fig. 5a). It contains an axial  
176 channel that is continuous with that of the portal complex (Fig. 1b). The structure of the lower  
177 collar protein could be built except for residues 1 and 154–186 out of 251. It can be divided into  
178 three parts: the curly domain (residues 3–116 and 222–251), tube domain (116–154 and 184 –  
179 222), and knob connector loop (154 – 184) (Fig. 5b). The curly domain, formed by six  $\alpha$ -helices,  
180 mediates the attachment of the lower collar complex to the portal complex and tail fibers. The  
181 tube domain is composed of two antiparallel  $\beta$ -strands (Fig. 5b). Twelve tube domains form a  $\beta$ -  
182 barrel with twenty-four  $\beta$ -strands, which is 108 Å long (Fig. 5a). The knob connector loops  
183 enable the attachment of the tail knob complex, with sixfold symmetry, to the lower collar  
184 complex.

185 Portal and lower collar complexes of P68 form a channel with a total length of 270 Å  
186 (Fig. 5c). The inner diameter of the channel varies from 30 Å to 55 Å. The surface charge  
187 distribution inside the channel is mostly negative, but it is interrupted by neutral and positively  
188 charged layers (Fig. 5c).

### 189 **Tail knob and tail spike**

190 The tail of P68 continues beyond the lower collar protein by tail knob gp13 and tail spike  
191 gp11 (Fig. 1ab). The two complexes were reconstructed to resolutions of 11 Å and 7 Å,  
192 respectively, indicating that they are more flexible than the parts of the tail near the phage head  
193 (Fig. 5d-g). This flexibility may be required to allow the putative cell wall-degrading enzymes  
194 located in the tail spike to cleave a pore in the bacterial cell wall to enable genome delivery.

195 The previously determined crystal structure of the tail knob of *Streptococcus* phage C1  
196 fits into the reconstruction of the corresponding part of the P68 tail with a correlation  
197 coefficient of 0.65 (Fig. 5f) (Table S4)<sup>29</sup>. The length of the P68 tail knob is 130 Å along the tail  
198 axis. It has an outer diameter of 80 Å and inner tube diameter of 40 Å. The channel is continuous  
199 with that of the lower collar protein (Fig. 1b). The tail of native P68 contains a tubular density  
200 that may belong to a terminal protein (Fig. 1b, 5e), which is covalently linked to the end of P68  
201 DNA<sup>13</sup>.

202 An asymmetric reconstruction of the tail spike provides evidence that it has fivefold  
203 symmetry (SFig. 9). Fivefold symmetrized, localized reconstruction of the tail spike shows that it  
204 is 110 Å long and has a maximum diameter of 70 Å (Fig. 5g). It can be divided into the chalice,

205 which mediates attachment to the tail knob, and distal lysis domain (Fig. 5g). Sequence  
206 comparisons indicate that the tail spike of P68 is homologous to the PlyCb lysin from phage C1  
207 (Table S5)<sup>30</sup>. However, the structure of PlyCb does not fit into the reconstruction of the P68 tail  
208 spike<sup>31</sup>. Other proteins with peptidoglycan degradation activities such as the amidase from  
209 *S. aureus*, peptidases from *Staphylococcus saprophyticus*, and endolysin from staphylococcal  
210 phage K are homologous to the last 130 amino acids of the P68 tail spike protein (SFig. 9). This  
211 indicates that the tail spike proteins of P68 degrade the bacterial cell wall to enable access of  
212 the phage to the cytoplasmic membrane.

### 213 **Tail fibers**

214 The tail fibers of P68 form a skirt-like structure around the tail (Fig. 1a, Fig 6a). Each tail  
215 fiber is a trimer of 647-residue-long gp17 subunits (Fig. 6b). The tail fiber can be divided into the  
216 N-terminal stem domain (residues 1-145), platform (151-445), and C-terminal tower (446-647)  
217 (Fig. 6b).

218 Cryo-EM reconstruction of the P68 tail enabled the building of the structure of the stem  
219 domain, which can be further sub-divided into a connector (residues 1-45), shoulder (46-80),  
220 hinge (81-115), and arm (116-145) (Fig. 6b). Because of the asymmetric shape of the tail fiber,  
221 the three constituent subunits (A, B, and C) differ in structure from each other (Fig. 6b).  
222 Functionally important differences are found in the connector regions that mediate the  
223 attachment of the tail fiber to the portal and lower collar complexes (Fig. 6a). The connector  
224 domain of subunit A and shoulder from subunit C form a noose-like structure that encircles the  
225 N-terminal tail-fiber hook of the portal protein (Fig. 6a). The connector of subunit B binds to the  
226 shoulder domains of subunits A and B from the tail fiber positioned counterclockwise when  
227 looking at the tail from the direction of the head (Fig. 6a). The first structured residue of the  
228 connector of subunit C (thr 24) is located between the clamp domain of subunit B from the tail  
229 fiber positioned clockwise and shoulder domain of subunit C and the clamp domain of subunit A  
230 positioned counterclockwise (Fig. 6a). Thus the N-terminus of C subunit mediates interactions  
231 between tail fibers that are one position removed from each other.

232 The shoulder domain of the tail fiber is straight until the hinge domain, which introduces  
233 a turn of 110° (Fig. 6b). The hinge of subunit C is formed by two  $\alpha$ -helices connected by a short  
234 loop, which allows the chain to bend and pass under subunits A and B (Fig. 6b). After the hinge,  
235 the three subunits form a straight coiled-coil arm (Fig. 6b).

236 The cryo-EM reconstruction of the P68 tail is complemented by the crystal structure of  
237 the tail-fiber protein determined to a resolution of 2.0 Å (Table S6). Although the full-length tail  
238 fiber protein was used for crystallization, only the platform and tower domains (residues 139-  
239 647) were resolved (Table S6). The combination of cryo-EM and X-ray results allowed  
240 construction of the complete tail fiber.

241 The platform domain of the P68 tail fiber has a five-bladed  $\beta$ -propeller fold (Fig. 6b).  
242 Each of the blades contains four anti-parallel  $\beta$ -strands. The domain is cyclically enclosed, since  
243 the first N-terminal  $\beta$ -strand of the domain is part of the same blade as the last three C-terminal

244  $\beta$ -strands (Fig. 6b). It has been shown that the platform domains of various phages, including  
245 phi11, PRD1, and PhiKZ, contain receptor-binding sites<sup>32-34</sup>. The platform of the P68 tail fiber is  
246 similar in structure to that of staphylococcal phage phi11 from the family *Siphoviridae*, with an  
247 RMSD of the corresponding C $\alpha$  atoms of 1.10 Å. The sequence identity of the two proteins is  
248 24%. There are differences in the receptor-binding sites within the platform domains of the two  
249 phages that may reflect their different receptor requirements (SFig. 10). Whereas P68 binds to  
250 wall teichoic acid glycosylated with  $\beta$ -O-N-acetyl-glucosamine, phi11 can attach to both  $\beta$ -O-N-  
251 acetyl-glucosamine and  $\alpha$ -O-N-acetyl-glucosamine<sup>2</sup>.

252 The tower domain of the P68 tail fiber is composed of two sub-domains (residues 454 –  
253 555 and 556 – 645), which are structurally similar to each other (Fig. 6b). Each sub-domain is  
254 formed of a four-stranded antiparallel beta-sheet connected by loops and two short helices  
255 (Fig. 6b). The beta-sheets are positioned close to the threefold axis of the fiber, whereas the  
256 loops and helices are exposed at the surface. The sub-domains are homologous to putative  
257 major teichoic acid biosynthesis protein C, muramidases, and receptor binding fibers of R-type  
258 pyocin (Table S7)<sup>35</sup>. Thus, the tower region may be involved in binding to the cell wall or  
259 peptidoglycan digestion. Compared to the tail fiber of phage phi11, the platform and tower  
260 domains of P68 exhibit domain swapping within the trimer of the tail fiber (SFig. 11)<sup>32</sup>.

261 The cryo-EM structure of P68 tail shows interactions of residues 229-271 of platform  
262 domain of subunit B with residues 349-386 of chain A and 180-268 of chain B of platform  
263 domains from the neighboring tail fiber (Fig. 1ab, Fig. 6a). The interface has a buried surface  
264 area of 1,100 Å<sup>2</sup> and it is likely that it stabilizes the “skirt” structure of P68 tail fibers. The  
265 flexibility of the hinge region of tail fibers was proposed to facilitate receptor binding in other  
266 phages<sup>32</sup>. In contrast, in P68 the structure of tail fibers appears to be rigid.

### 267 **Changes in P68 particles associated with genome release**

268 The genome release of P68 is connected to the disruption of the unique contact of the  
269 portal protein subunit with the DNA, loss of the ordering of most of the wing domains of the  
270 portal proteins and of the inner core proteins (Fig. 1b-d, SFig. 12). Unlike phage phi29, P68  
271 particles do not bind to liposomes at low pH (SFig. 13)<sup>36</sup>, instead they aggregate with each other  
272 through their tails (SFig. 13). However, liposomes in the mixture with P68 became distorted  
273 (SFig. 13). It is possible that the ejected inner core proteins, which contain predicted pore-lining  
274 helices (SFig. 7), interfered with the liposome integrity.

275 The heads of P68 particles in the process of genome release contain shells of packaged  
276 DNA that are spaced 26-30 Å apart, whereas in the full virions the DNA spacing is 20 Å (Fig. 1bc,  
277 SFig. 14). The resolved structure of the layers of dsDNA in the P68 genome release intermediate  
278 indicates that all the particles released similar amounts of DNA and provides evidence of a  
279 gradual relaxation of the DNA packing during the genome release.

280 Only 2% of P68 genome release intermediates and empty particles retained their tail  
281 knobs and tail spikes *in vitro* (SFig. 1). However, the tail knobs and tail spikes of the complete

282 empty particles contain central channels (Fig. 1d), indicating that the complexes may remain  
283 attached to P68 virions during genome release *in vivo*.

284

#### 285 **Mechanism of P68 genome delivery**

286 P68 virions bind to the *S. aureus* cell either by head or tail fibers (Fig. 7). After the  
287 attachment, tail spike proteins degrade the cell wall, which allows the phage to position itself  
288 with its tail axis perpendicular to the cell surface (Fig. 7). Further cell wall digestion enables the  
289 tip of the P68 tail to reach the *S. aureus* cytoplasmic membrane. The signal triggering P68  
290 genome release is unknown, however, it may be the binding of the tail spike to a receptor in the  
291 membrane, exposure of the tail spike to the hydrophobic environment of the membrane, or a  
292 sensing of the trans-membrane potential<sup>1</sup>. Subsequently, conformational changes of the P68  
293 portal enable ejection of the inner core proteins and DNA through the tail channel. The inner  
294 core proteins may form a pore in the bacterial membrane for delivering phage DNA into the  
295 bacterial cytoplasm (Fig. 7).

296

297 **Acknowledgements**

298 We acknowledge the CEITEC Core Facilities Cryo-Electron Microscopy and Tomography,  
299 Proteomics, and Biomolecular Interactions, supported by the CIISB project LM2015043 funded  
300 by the MEYS of the Czech Republic. X-ray data were collected at synchrotron ‘Soleil’ beamline  
301 Proxima 1. This research was carried out under the project CEITEC 2020 (LQ1601), with financial  
302 support from the MEYS of the Czech Republic under National Sustainability Program II. This work  
303 was supported by IT4I project (CZ.1.05/1.1.00/02.0070), funded by the European Regional  
304 Development Fund and the national budget of the Czech Republic via the RDI-OP, as well as the  
305 MEYS via the Grant (LM2011033). The research leading to these results has received funding  
306 from the Ministry of Health of the Czech Republic grant 16-29916A to RP, Grant Agency of the  
307 Czech Republic grants 15-21631Y and 18-17810S and from EMBO installation grant 3041 to PP.  
308



309 **Figures:**

310

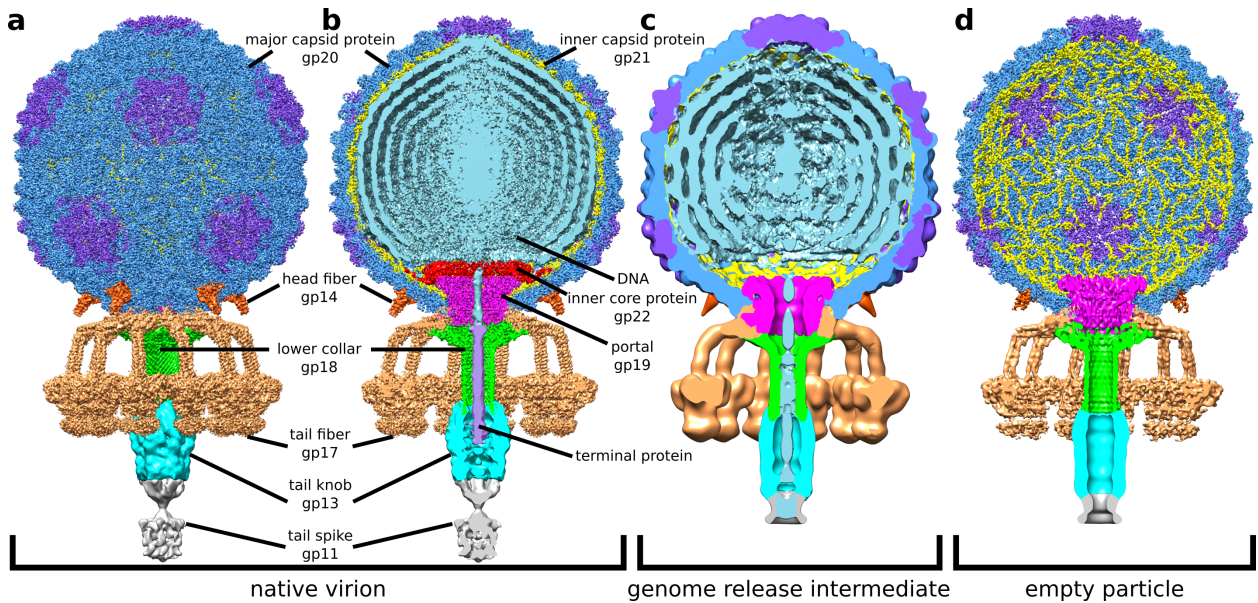

311

312

313

314

315

**Fig. 1. Structures of P68 virion (a, b), genome release intermediate (c), and empty particle (d).**

The whole P68 virion is shown in (a), whereas particles without the front half are shown in (b-d).

The structures are colored to distinguish individual types of structural proteins and DNA.



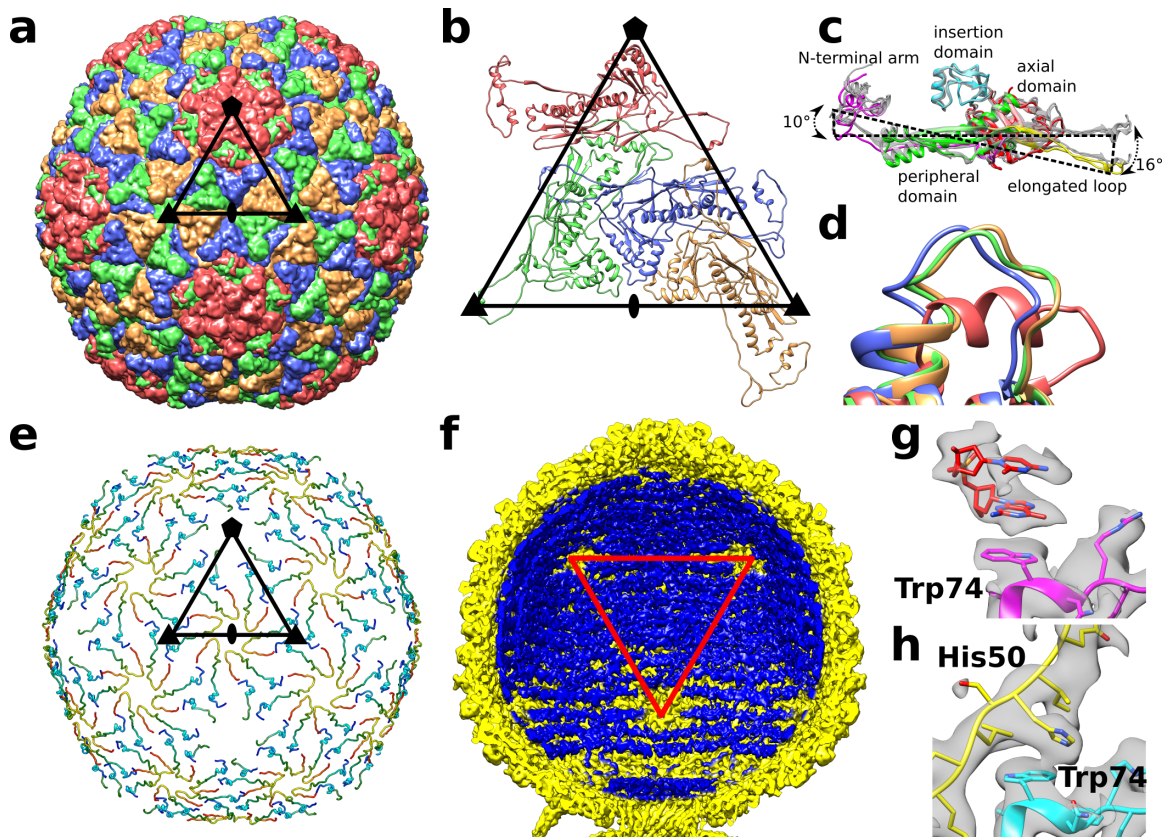

316  
317 **Fig. 2. Capsid structure of P68.** Major capsid proteins of P68 have HK97 fold and form T = 4  
318 icosahedral lattice (a). Positions of selected icosahedral five, three, and twofold symmetry axes  
319 are indicated by pentagon, triangles, and oval. Borders of one icosahedral asymmetric unit are  
320 highlighted. Cartoon representation of P68 major capsid proteins in icosahedral asymmetric  
321 unit. Positions of icosahedral symmetry axes and borders of icosahedral asymmetric unit are  
322 shown. Major capsid proteins from icosahedral asymmetric unit differ in positions of elongated  
323 loops and N-terminal domains (c). Color-coding of one of the subunits indicates division of major  
324 capsid protein to domains. Residues 253-263 from the axial domain of major capsid proteins  
325 differ in structure (d). The residues form an  $\alpha$  helix in the subunit that is part of the pentamers,  
326 whereas they constitute loops in the other subunits. The color-coding of subunits is the same as  
327 in (b). The inner capsid protein is organized in a T=4 icosahedral lattice. Proteins are rainbow  
328 colored from N-terminus in blue to C-terminus in red. Subunits related by icosahedral threefold  
329 axes and quasi-threefold axes of the T=4 lattice form three-pointed stars in which the C-  
330 terminus of one subunit is positioned next to the N-terminus of another subunit (e). Borders of a  
331 selected icosahedral asymmetric unit are shown. The ordering of the packaged P68 double-  
332 stranded DNA genome (shown in blue) is disrupted around the fivefold vertices of the capsid  
333 (shown in yellow) (f). Red triangle indicates one face of icosahedron. Stacking interactions of  
334 two nucleotides with side-chain of trp 74 of major capsid protein located next to fivefold vertex  
335 (g). Side chains of trp 74 of major capsid proteins that form hexamers bind to his 50 of inner  
336 capsid proteins (h).

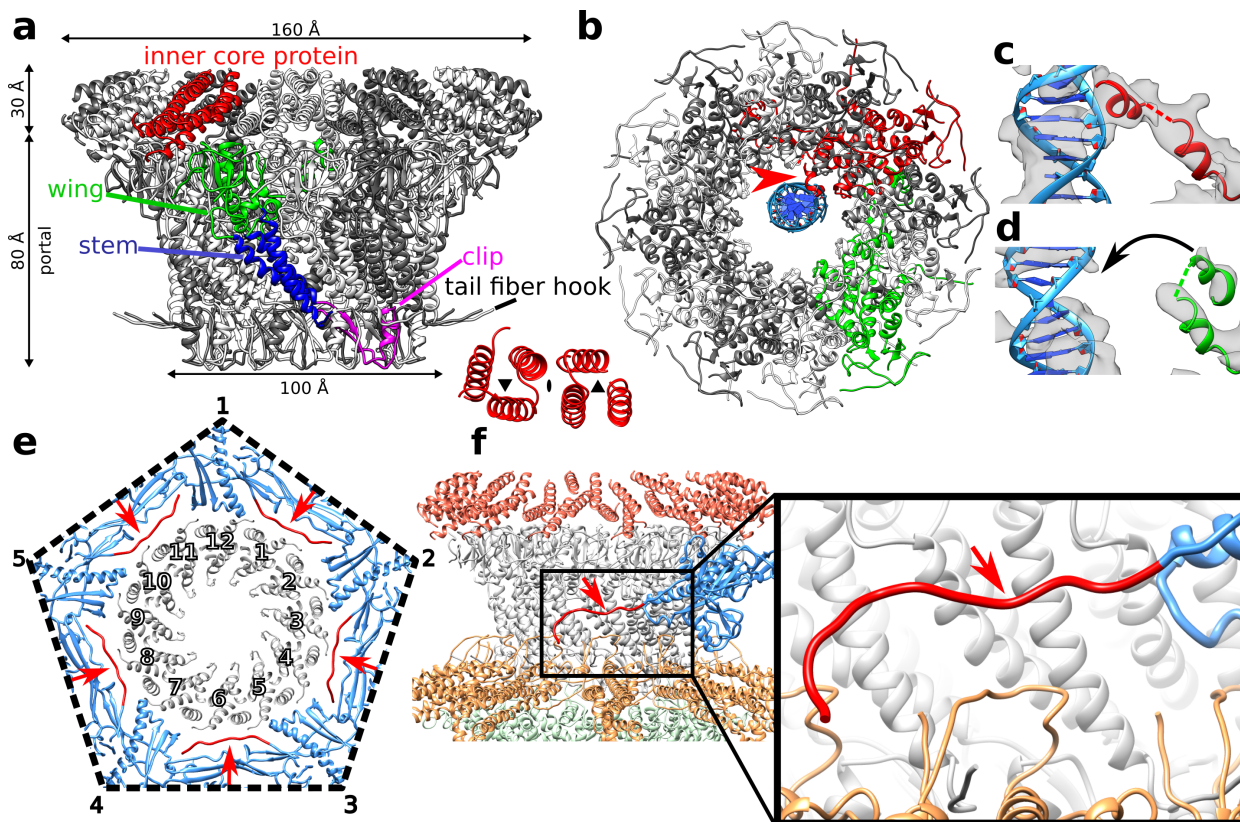

337

338

339

340

341

342

343

344

345

346

347

348

349

350

351

352

353

354

**Fig. 3. Structure of P68 portal complex and its interaction with capsid.** Structure of P68 portal and inner core complexes (a). One of the portal proteins is colored according to domains: clip domain in yellow, wing in green, and stem in blue. Six inner core proteins associated with one portal protein subunit are highlighted in red. The inset shows the symmetry of the arrangement of the six inner core proteins. Asymmetric reconstruction of portal complex showing interactions of one of the portal proteins highlighted in red with DNA shown in blue (b). The interaction is indicated with a red arrow. One of the portal protein subunits that does not interact with the DNA is highlighted in green. Detail of interaction of helix  $\alpha 9$  of portal protein with DNA (c). Cryo-EM density is shown as grey transparent surface. Structure of portal protein subunit that does not interact with DNA (d). Interface between portal complex and capsid (e). Portal proteins are shown in grey, capsid proteins in blue, and N-termini of capsid proteins that mediate interactions with the portal are shown in red and highlighted with red arrows. Side view of capsid-portal interactions (f). Single major capsid protein is shown in blue and its N-terminus in red, portal proteins are shown in grey, inner core proteins in red, tail fibers in orange and lower collar proteins in green. The inset shows detail of interactions between the N-terminal arm of the major capsid protein and stem domains of portal proteins.

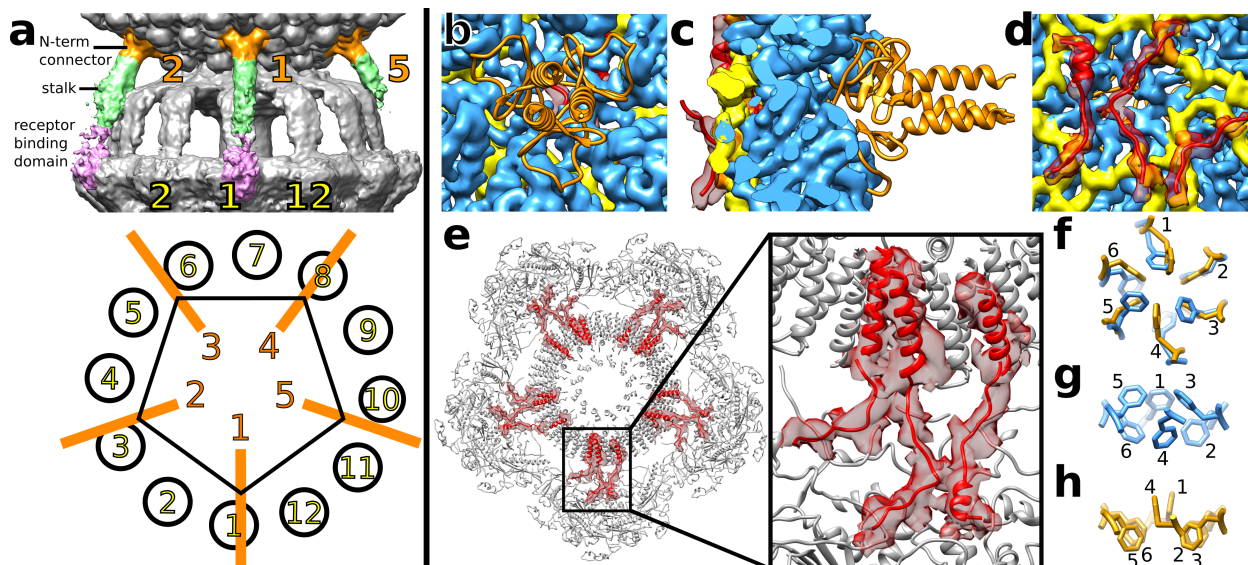

355  
356  
357  
358  
359  
360  
361  
362  
363  
364  
365  
366  
367  
368  
369  
370  
371  
372  
373  
374  
375

**Fig. 4. Head of P68 is decorated with five head fibers attached to hexamers of major capsid proteins located next to tail vertex.** P68 head is decorated with five head fibers that extend towards tail fibers (a). The head fibers can be divided into the N-terminal connector shown in orange, stalk in green, and receptor binding domain in pink. Because of the mismatch of the fivefold symmetry of the head and twelfold symmetry of the tail, only fibers 1, 2, and 4 are stabilized by interactions with tail fibers. N-terminal connector domains of head fibers (shown in cartoon representation in orange) are attached to hexamers of major capsid proteins (shown as blue density) (b-d). Cryo-EM density of inner capsid proteins is shown in yellow and arms of inner core proteins, which interact with major capsid proteins, are shown in cartoon representation in red. Cryo-EM density of inner core proteins is shown as semi-transparent red surface. External view of P68 head (b), section through capsid (c), and internal view of capsid (d). Section through P68 head perpendicular to tail axis at level of inner core complex (e). Inner core proteins that interact with major capsid proteins are highlighted in red. The electron density of the inner core proteins is shown as a red semi-transparent surface. Details of organization of phe 259 side chains around quasi-sixfold axis of hexamer of major capsid proteins (f-h). In hexamers that interact with inner core proteins, side-chains (in orange) are organized with threefold symmetry in alternating up and down conformations (f,g). In hexamers of capsid proteins that do not interact with inner core proteins, (blue) phe 259 side chains are organized with twofold symmetry with two side-chains pointing into capsid and four out (f,h).



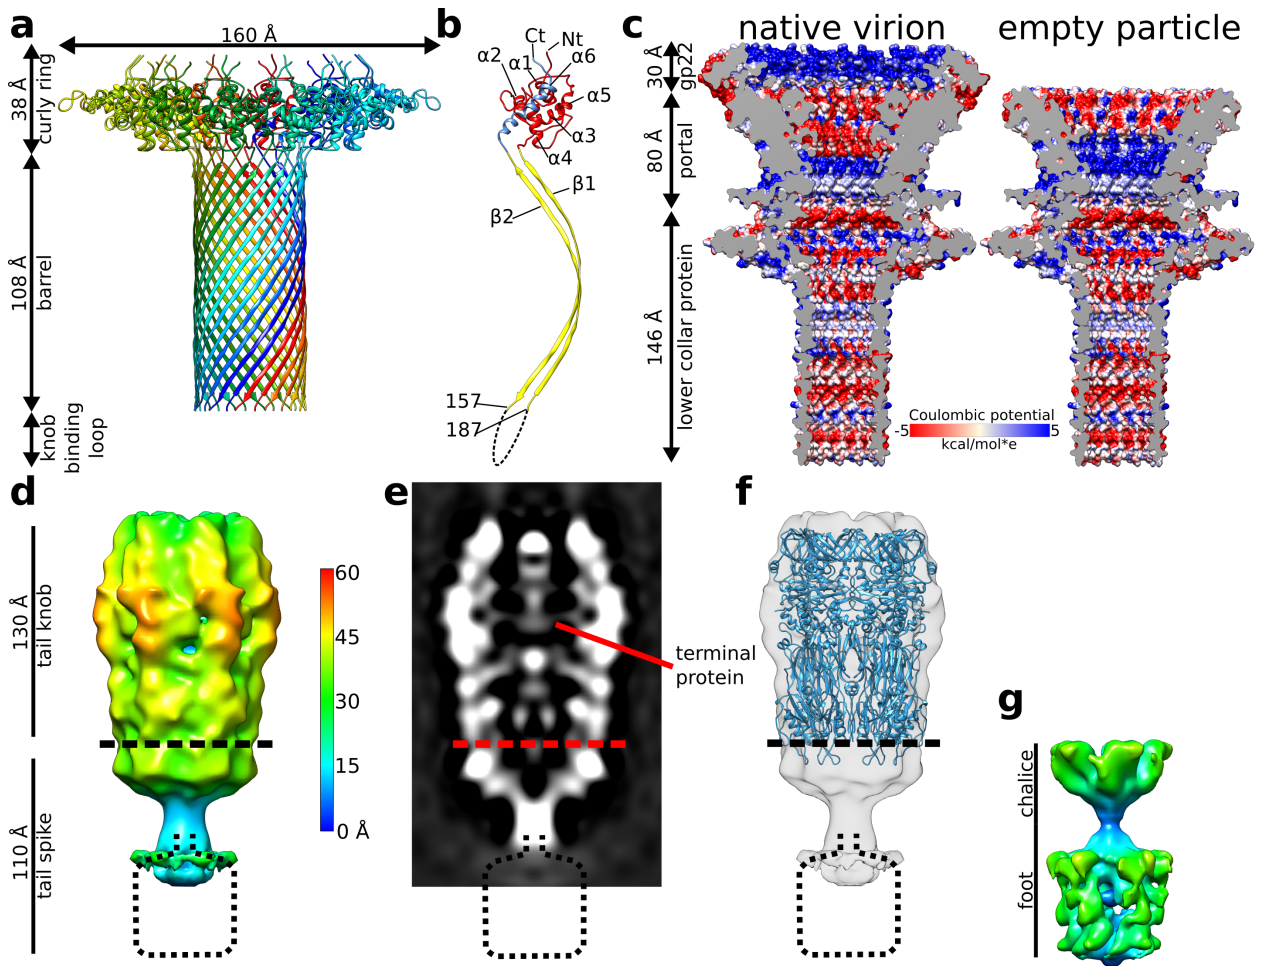

376

377

378

379

380

381

382

383

384

385

386

387

**Fig. 5. Structure of P68 tail.** Structure of lower collar complex (a) with individual subunits distinguished by rainbow-coloring. Division of lower collar protein into domains (b). The curly ring domain is shown in red and blue, barrel domain in yellow, and the knob binding loop with unknown structure is indicated by the dashed line. Surface charge distribution in inner core, portal, and lower collar complexes of full and empty P68 particles (c). Sixfold-symmetrized reconstruction of P68 tail knob and tail spike complexes (d). The surface of the cryo-EM map is radially colored based on the distance from the sixfold axis of the complex. Distribution of electron density in central section of tail knob and tail spike complexes (e). Fit of structure of tail knob of phage p22 into P68 reconstruction (f). Structure of tail spike with imposed fivefold symmetry shows its chalice and foot domains (g).

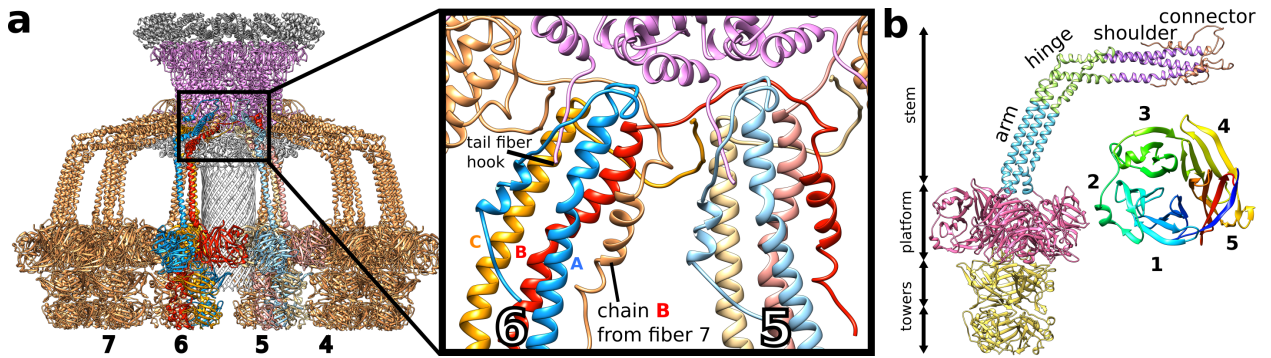

388

389

390

391

392

393

394

395

396

397

398

**Fig. 6. Structure of P68 tail fibers.** Tail fibers of P68 form “skirt” around tail tube (a). Tail fibers are shown in orange, however, individual subunits of two tail fibers are distinguished in red, blue, and orange. Portal proteins are shown in magenta, inner core proteins in dark grey, and lower collar proteins in light grey. The inset shows details of interactions of tail fibers with each other and their attachment to the portal complex. Structure of P68 tail fiber in cartoon representation and its division into domains (b). The inset shows a cartoon representation of the platform domain of the P68 tail fiber rainbow colored from N-terminus in blue to C-terminus in red.

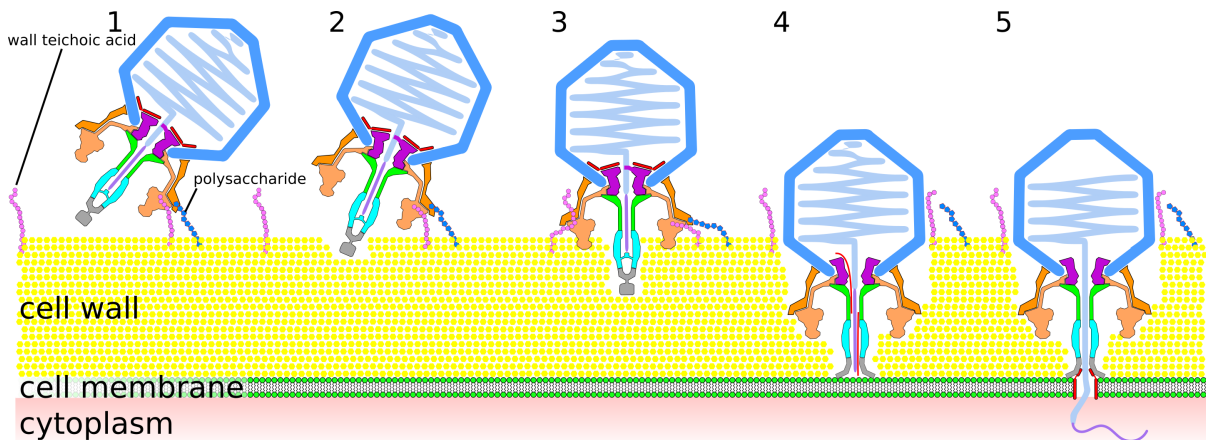

399

400

401

402

403

404

405

406

**Fig. 7. Mechanism of P68 genome delivery into *S. aureus* cell.** P68 virion attaches to cell surface by head or tail fibers (1). This attachment allows enzymes from tail spike to cleave bacterial cell wall (2). This degradation of *S. aureus* cell wall enables P68 to bind with its tail axis perpendicular to cell surface (3). Further cell wall digestion allows tip of P68 tail to reach cytoplasmic membrane, which triggers release of inner core proteins and DNA (4). Inner core proteins form channel in membrane for ejection of phage DNA into bacterial cytoplasm (5).

407 **References**

- 408 1 Casjens, S. R. & Molineux, I. J. Short noncontractile tail machines: adsorption and DNA  
409 delivery by podoviruses. *Adv Exp Med Biol* **726**, 143-179, doi:10.1007/978-1-4614-0980-  
410 9\_7 (2012).
- 411 2 Li, X. *et al.* An accessory wall teichoic acid glycosyltransferase protects *Staphylococcus*  
412 *aureus* from the lytic activity of Podoviridae. *Sci Rep* **5**, 17219, doi:10.1038/srep17219  
413 (2015).
- 414 3 Uchiyama, J. *et al.* Adsorption of *Staphylococcus* viruses S13<sup>1</sup> and S24-1 on  
415 *Staphylococcus aureus* strains with different glycosidic linkage patterns of wall teichoic  
416 acids. *J Gen Virol* **98**, 2171-2180, doi:10.1099/jgv.0.000865 (2017).
- 417 4 Takemura-Uchiyama, I. *et al.* Experimental phage therapy against lethal lung-derived  
418 septicemia caused by *Staphylococcus aureus* in mice. *Microbes Infect* **16**, 512-517,  
419 doi:10.1016/j.micinf.2014.02.011 (2014).
- 420 5 Son, J. S. *et al.* Antibacterial and biofilm removal activity of a podoviridae  
421 *Staphylococcus aureus* bacteriophage SAP-2 and a derived recombinant cell-wall-  
422 degrading enzyme. *Applied microbiology and biotechnology* **86**, 1439-1449,  
423 doi:10.1007/s00253-009-2386-9 (2010).
- 424 6 Chhibber, S., Kaur, T. & Sandeep, K. Co-therapy using lytic bacteriophage and linezolid:  
425 effective treatment in eliminating methicillin resistant *Staphylococcus aureus* (MRSA)  
426 from diabetic foot infections. *PloS one* **8**, e56022, doi:10.1371/journal.pone.0056022  
427 (2013).
- 428 7 Sulakvelidze, A., Alavidze, Z. & Morris, J. G., Jr. Bacteriophage therapy. *Antimicrobial*  
429 *agents and chemotherapy* **45**, 649-659, doi:10.1128/AAC.45.3.649-659.2001 (2001).
- 430 8 Chan, M. Antimicrobial resistance in the European Union and the world. Address  
431 Director-General of the World Health Organization at the conference on Combating  
432 antimicrobial resistance: time for action. Copenhagen, Denmark. 14 March 2012.  
433 [http://www.who.int/dg/speeches/2012/amr\\_20120314/en/](http://www.who.int/dg/speeches/2012/amr_20120314/en/).
- 434 9 Kurlenda, J. & Grinholc, M. Alternative therapies in *Staphylococcus aureus* diseases.  
435 *Acta biochimica Polonica* **59**, 171-184 (2012).
- 436 10 Lee, B. Y. *et al.* The economic burden of community-associated methicillin-resistant  
437 *Staphylococcus aureus* (CA-MRSA). *Clin Microbiol Infect* **19**, 528-536,  
438 doi:10.1111/j.1469-0691.2012.03914.x (2013).
- 439 11 Gould, I. M., Reilly, J., Bunyan, D. & Walker, A. Costs of healthcare-associated  
440 methicillin-resistant *Staphylococcus aureus* and its control. *Clin Microbiol Infect* **16**,  
441 1721-1728, doi:10.1111/j.1469-0691.2010.03365.x (2010).
- 442 12 ECDC, E. The bacterial challenge: time to react, ECDC & EMEA, Stockholm. *ECDC/EMEA*  
443 *Joint Technical Report* (2009).
- 444 13 Vybiral, D. *et al.* Complete nucleotide sequence and molecular characterization of two  
445 lytic *Staphylococcus aureus* phages: 44AHJD and P68. *FEMS Microbiol Lett* **219**, 275-283  
446 (2003).
- 447 14 Caspar, D. L. & Klug, A. Physical principles in the construction of regular viruses. *Cold*  
448 *Spring Harb Symp Quant Biol* **27**, 1-24 (1962).
- 449 15 Wikoff, W. R. *et al.* Topologically linked protein rings in the bacteriophage HK97 capsid.  
450 *Science* **289**, 2129-2133 (2000).
- 451 16 Zhou, Z. H. *et al.* Seeing the herpesvirus capsid at 8.5 Å. *Science* **288**, 877-880 (2000).
- 452 17 Baker, M. L., Jiang, W., Rixon, F. J. & Chiu, W. Common ancestry of herpesviruses and  
453 tailed DNA bacteriophages. *J Virol* **79**, 14967-14970, doi:10.1128/JVI.79.23.14967-  
454 14970.2005 (2005).

- 455 18 Abrescia, N. G. *et al.* Insights into assembly from structural analysis of bacteriophage  
456 PRD1. *Nature* **432**, 68-74, doi:10.1038/nature03056 (2004).
- 457 19 Kim, K. J., Sunshine, M. G., Lindqvist, B. H. & Six, E. W. Capsid size determination in the  
458 P2-P4 bacteriophage system: suppression of sir mutations in P2's capsid gene N by  
459 supersid mutations in P4's external scaffold gene sid. *Virology* **283**, 49-58,  
460 doi:10.1006/viro.2001.0853 (2001).
- 461 20 Sun, L. *et al.* Cryo-EM structure of the bacteriophage T4 portal protein assembly at near-  
462 atomic resolution. *Nat Commun* **6**, 7548, doi:10.1038/ncomms8548 (2015).
- 463 21 Lebedev, A. A. *et al.* Structural framework for DNA translocation via the viral portal  
464 protein. *EMBO J* **26**, 1984-1994, doi:10.1038/sj.emboj.7601643 (2007).
- 465 22 Olia, A. S., Prevelige, P. E., Jr., Johnson, J. E. & Cingolani, G. Three-dimensional structure  
466 of a viral genome-delivery portal vertex. *Nat Struct Mol Biol* **18**, 597-603,  
467 doi:10.1038/nsmb.2023 (2011).
- 468 23 Simpson, A. A. *et al.* Structure of the bacteriophage phi29 DNA packaging motor. *Nature*  
469 **408**, 745-750, doi:10.1038/35047129 (2000).
- 470 24 Nugent, T. & Jones, D. T. Transmembrane protein topology prediction using support  
471 vector machines. *BMC Bioinformatics* **10**, 159, doi:10.1186/1471-2105-10-159 (2009).
- 472 25 Tremblay, D. M. *et al.* Receptor-binding protein of *Lactococcus lactis* phages:  
473 identification and characterization of the saccharide receptor-binding site. *J Bacteriol*  
474 **188**, 2400-2410, doi:10.1128/JB.188.7.2400-2410.2006 (2006).
- 475 26 Ricagno, S. *et al.* Crystal structure of the receptor-binding protein head domain from  
476 *Lactococcus lactis* phage bIL170. *J Virol* **80**, 9331-9335, doi:10.1128/JVI.01160-06 (2006).
- 477 27 Desmyter, A. *et al.* Viral infection modulation and neutralization by camelid nanobodies.  
478 *Proc Natl Acad Sci U S A* **110**, E1371-1379, doi:10.1073/pnas.1301336110 (2013).
- 479 28 Takac, M. & Blasi, U. Phage P68 virion-associated protein 17 displays activity against  
480 clinical isolates of *Staphylococcus aureus*. *Antimicrobial agents and chemotherapy* **49**,  
481 2934-2940, doi:10.1128/AAC.49.7.2934-2940.2005 (2005).
- 482 29 Aksyuk, A. A. *et al.* Structural investigations of a Podoviridae streptococcus phage C1,  
483 implications for the mechanism of viral entry. *Proc Natl Acad Sci U S A* **109**, 14001-  
484 14006, doi:10.1073/pnas.1207730109 (2012).
- 485 30 Nelson, D., Schuch, R., Chahales, P., Zhu, S. & Fischetti, V. A. PlyC: a multimeric  
486 bacteriophage lysin. *Proc Natl Acad Sci U S A* **103**, 10765-10770,  
487 doi:10.1073/pnas.0604521103 (2006).
- 488 31 McGowan, S. *et al.* X-ray crystal structure of the streptococcal specific phage lysin PlyC.  
489 *Proc Natl Acad Sci U S A* **109**, 12752-12757, doi:10.1073/pnas.1208424109 (2012).
- 490 32 Koc, C. *et al.* Structure of the host-recognition device of *Staphylococcus aureus* phage  
491 varphi11. *Sci Rep* **6**, 27581, doi:10.1038/srep27581 (2016).
- 492 33 Xu, L., Benson, S. D., Butcher, S. J., Bamford, D. H. & Burnett, R. M. The receptor binding  
493 protein P2 of PRD1, a virus targeting antibiotic-resistant bacteria, has a novel fold  
494 suggesting multiple functions. *Structure* **11**, 309-322 (2003).
- 495 34 Sycheva, L. V. *et al.* Crystal structure and location of gp131 in the bacteriophage phiKZ  
496 virion. *Virology* **434**, 257-264, doi:10.1016/j.virol.2012.09.001 (2012).
- 497 35 Buth, S. A., Shneider, M. M., Scholl, D. & Leiman, P. G. Structure and Analysis of R1 and  
498 R2 Pyocin Receptor-Binding Fibers. *Viruses* **10**, doi:10.3390/v10080427 (2018).
- 499 36 Xu, J., Gui, M., Wang, D. & Xiang, Y. The bacteriophage varphi29 tail possesses a pore-  
500 forming loop for cell membrane penetration. *Nature* **534**, 544-547,  
501 doi:10.1038/nature18017 (2016).
- 502
